# Supplementary material for: Paradoxical combination of saturable absorption and reverse-saturable absorption in plasmon semiconductor nanocrystals
Source: PubMed Central journal article supplement — Nanoscale Adv. 2020 Feb 25;2(4):1676–84. doi: 10.1039/c9na00694j (PMC9417615; doi:10.1039/c9na00694j), 2020-02-25
Supplement: NA-002-C9NA00694J-s001.pdf [file NA-002-C9NA00694J-s001.pdf]

# Paradoxical Combination of Saturable Absorption and Reverse-Saturable Absorption in Plasmon Semiconductor Nanocrystals

**Xiangling Tian,<sup>1,2</sup> Rongfei Wei,<sup>3\*</sup> Dandan Yang,<sup>1</sup> and Jianrong Qiu<sup>1,4\*</sup>**

*<sup>1</sup>State Key Laboratory of Luminescent Materials and Devices, Institute of Optical Communication Materials, School of Materials Science*

*and Engineering, South China University of Technology, Wushan Road 381, Guangzhou 510641, PR China*

*<sup>2</sup>Division of Physics and Applied Physics, School of Physical and Mathematical Sciences, Nanyang Technological University, 21 Nanyang*

*Link, Singapore 637371, Singapore*

*<sup>3</sup>Department of Physics, Zhejiang Normal University, Jinhua, Zhejiang, 321004, PR China*

*<sup>4</sup>State Key Laboratory of Modern Optical Instrumentation, College of Optical Science and Engineering, Zhejiang University, Hangzhou,*

*Zhejiang 310027, PR China*

*\*qjr@zju.edu.cn; rfwei@zjnu.edu.cn*

Supporting Information

## **1. Experiment section**

### **Synthesis of Al-doped ZnO nanocrystals (AZO NCs)**

The Al-doped ZnO nanocrystals were prepared by using zinc salts with the dopant ions in basic solution and the details is shown in our previous work.<sup>1</sup> In short, Zinc acetate dehydrate (8.714g,  $\text{Zn}(\text{CH}_3\text{COO})\cdot 2\text{H}_2\text{O}$ , 99.99%, Aladdin), aluminum hydroxide (0.958g,  $\text{Al}(\text{OH})_3$ , 99.9%, Aladdin), sodium hydroxide (NaOH, Aladdin) and distilled water (13 ml) were firstly dissolved in 80 ml diethylene glycol (DEG). Here, the Al dopant was adjusted to be 1wt% (or 3at%) to make sure that the start LSPR wavelength is less than 800 nm (the femtoseconds laser wavelength). The mixture was then heated up to 189 °C by oil-bath heating. After centrifuging and washing several times, the obtained nanocrystals were then dried in vaccum for next measurements. The Al-doped ZnO nanocrystals was dispersed into alcohol by ultrasonic oscillation and then spin-coated onto a 0.5 cm thick high-purity quartz slide for 10 times for characterization.

### **Characterization of Al-doped ZnO nanocrystals**

A confocal microscopy system (Renishaw inVia, Gloucestershire, UK) operated at 532 nm excitation source was used to record Raman signal. A Bruker diffractometer with  $\text{Cu K}\alpha_1$  radiation ( $\lambda=1.5418 \text{ \AA}$ ) was used to record the XRD pattern. A Perkin-Elmer Lambda-900 UV-Vis-NIR spectrophotometer (Perkin Elmer, Waltham, MA) was used to measure the linear optical absorption. An empty quartz slide was used to be a reference. The transmission electron microscope (TEM) images were recorded by a JEOL-2100F at 200 kV. Elemental analysis was measured by induced coupled plasma atomic emission spectroscopy (ICP-AES) with a Varian 720/730 Series spectrometer.

### **Z-scan**

Optical nonlinearities at 800 nm and 1550 nm were performed by a well-developed open-aperture Z-scan technique. The detailed description is shown in our previous work.<sup>2, 3</sup> In short, a commercial Ti:sapphire regenerative amplifier system (800 nm, 1 kHz, 130 fs) was employed to be the laser source. The wavelength is tuned by an optical parametric amplifier (OPA) from 800 nm to 1550 nm. The 0.5 mm thick high-purity quartz slide coated with the synthesized Al-doped ZnO nanocrystals was settled on a linear translation stage, which can

move near the focus to imitate the change of the femtosecond laser intensity.

### Pulse generation

The laser cavity is based on 2 m-long erbium-doped gain fiber (EDF). Another single mode fiber (SMF)-28e was used as the pigtailed of the corresponding components. A commercial 980 nm laser was used to excite the gain fiber through a 980/1550 nm wavelength division multiplexer (WDM). The cavity birefringence was adjusted by employing a polarization controller (PC). In order to make sure the single-direction operation, a polarization-independent optical isolator was constructed into the cavity. A 90:10 fiber coupler was adopted to output the laser. The AZO/PVA composite film was embedded between two fiber connectors and integrated into the laser cavity as saturable absorber for Q-switching operation. More details is shown in other article.<sup>2</sup>

### 2. Calculation of nonlinear absorption coefficient

For three-order nonlinearity process, the total absorption coefficient can be expressed as:

$$\alpha(I) = \alpha_0 + \beta I \quad (S1)$$

where  $\alpha_0$  is the linear absorption coefficient and  $\beta$  is three-order nonlinear absorption coefficient. The open-aperture Z-scan normalized transmittance can be expressed as:<sup>4</sup>

$$T(z) = \sum_{m=0}^{\infty} \frac{[q_0(z,0)]^m}{(m+1)^{3/2}}, \quad q_0(z,0) = \frac{\beta L_{\text{eff}} I_0}{(1 + z^2/z_0^2)} \quad (S2)$$

where  $I_0$  is the laser intensity at the focal plane;  $z$  is the sample position;  $z_0 = \pi\omega_0^2/\lambda$  presents the Rayleigh range,  $\omega_0$  presents the minimum beam waist at the focal plane ( $z=0$ ),  $\lambda$  presents the laser free-space wavelength;  $L_{\text{eff}} = (1 - \exp(-\alpha_0 L))/\alpha_0$  is the effective length for three-order nonlinearity process;  $L$  is the sample length.

In three photon absorption (fifth-order nonlinearity) process, the total absorption coefficient can be described by:

$$\alpha(I) = \alpha_0 + \gamma I^2 \quad (S3)$$

where  $\gamma$  is three photon absorption coefficient. The open-aperture Z-scan normalized transmittance can be deduced as:<sup>5</sup>

$$T(z) = \frac{1}{\pi^{1/2} p_0} \int_{-\infty}^{\infty} \ln \left\{ \left[ 1 + p_0^2 \exp(-2x^2) \right]^2 + p_0 \exp(-x^2) \right\} dx \quad (S4)$$

where  $p_0 = \left( \frac{2\gamma I_0^2 L'_{\text{eff}}}{(1 + z^2/z_0^2)^2} \right)^{1/2}$ ,  $L'_{\text{eff}} = [1 - \exp(-2\alpha_0 L)]/(2\alpha_0)$  is the effective length for three photon absorption process.

In the three-order nonlinearity and fifth-order nonlinearity (three photon absorption) process, the total absorption can be expressed as:

$$\alpha(I) = \alpha_0 + \beta I + \gamma I^2 \quad (S5)$$

The polynomial solution of the normalized transmittance as a function of the sample position  $x = z/z_0$  is deduced as:

$$T(x, t) = \exp(\alpha_0 L) \left[ 1 + \sum_{m=1}^{\infty} (-GL)^m q_m(\rho) \right] \quad (S6)$$

here,  $\rho = I_0 \exp(-t^2/\tau^2) / [I_s(1+x^2)]$ ,  $\tau$  is the half-width at  $e^{-1}$  of the maximum for the pulse duration;

$G = \alpha_0 + \beta I_s + \gamma I_s^2$ ,  $I_s$  is the saturable intensity. The first term of  $q_m(\rho)$  is considered and the  $q_1(\rho)$  is given as:<sup>6</sup>

$$q_1(\rho) = \left[ (\alpha_0 + \beta I - \gamma I_s^2) \rho + \frac{\gamma I_s^2 \rho^2}{2} + (\gamma I_s^2 - \beta I_s) \ln(1 + \rho) \right] / (\alpha_0 + \beta I_s + \gamma I_s^2) \quad (S7).$$

All the parameters are defined as the above. Hence, the open-aperture Z-scan normalized transmittance can be deduced as:<sup>6</sup>

$$T(x) = \frac{1}{\sqrt{\pi} \tau} \int_{-\infty}^{\infty} T(x, t) \exp(-t^2/\tau^2) dt \quad (S8).$$

### 3. Additional Figures

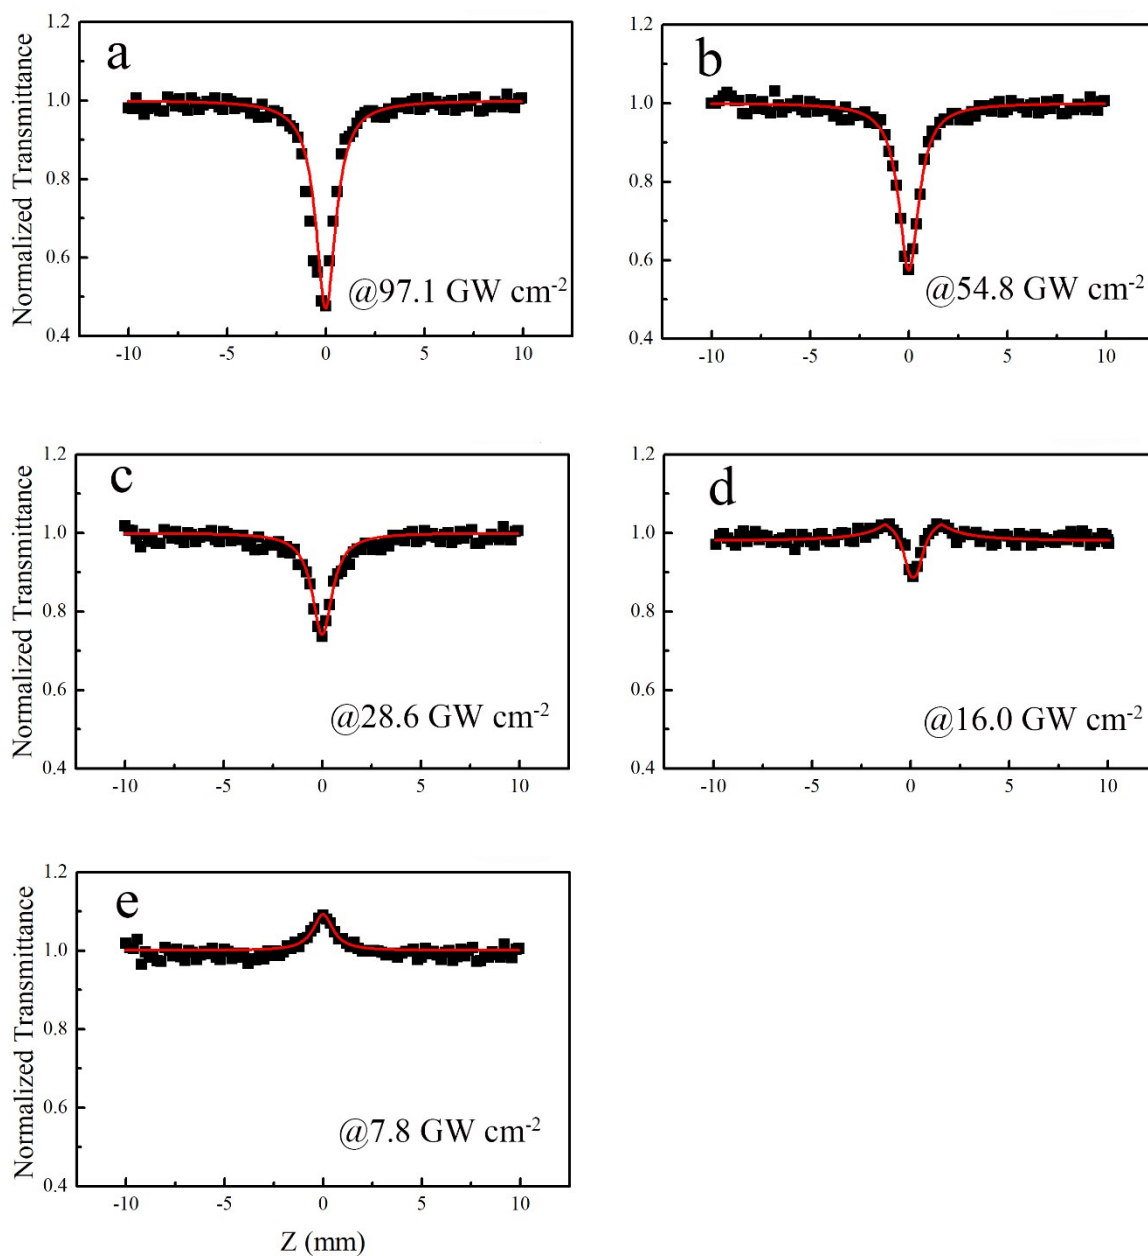

**Fig. S1.** Open Z-scan results (black square) and fitting curves (red line) of the AZO/Quartz film measured by decreasing the pump laser intensity.

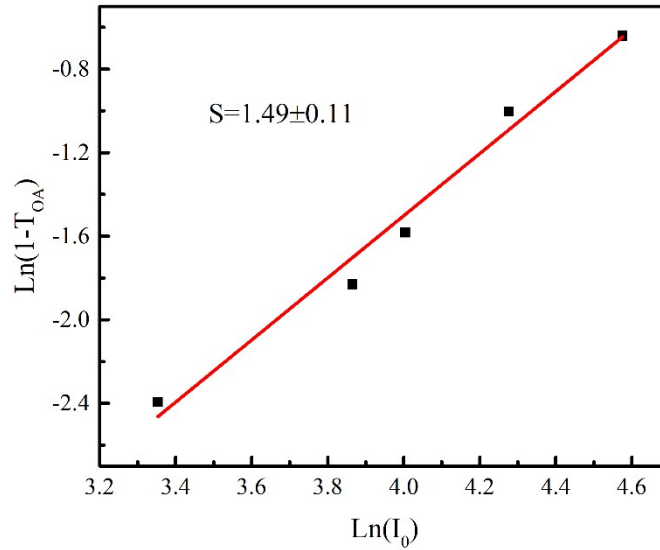

**Fig. S2.** The relationship between  $\ln(1-T_{OA})$  and  $\ln(I_0)$  shows the slope is about 1.49, which indicates three-photon absorption behavior under higher irradiation intensity range.

#### References:

1. X. Tian, H. Luo, R. Wei, M. Liu, Z. Yang, Z. Luo, H. Zhu, J. Li and J. Qiu, *Nanoscale*, 2019, **11**, 13988-13995.
2. R. Wei, H. Zhang, X. Tian, T. Qiao, Z. Hu, Z. Chen, X. He, Y. Yu and J. Qiu, *Nanoscale*, 2016, **8**, 7704-7710.
3. X. Tian, H. Luo, R. Wei, C. Zhu, Q. Guo, D. Yang, F. Wang, J. Li and J. Qiu, *Adv. Mater.*, 2018, **30**, 1801021.
4. M. Sheik-Bahae, A. A. Said, T. Wei, D. J. Hagan and E. W. V. Stryland, *IEEE J. Quant. Electron.*, 1990, **26**, 760-769.
5. J. He, Y. Qu, H. Li, J. Mi and W. Ji, *Opt. Express*, 2005, **13**, 9235-9247.
6. J. Wang, B. Gu, X.-W. Ni and H.-T. Wang, *Opt. Laser Technol.*, 2012, **44**, 390-393.
